# Supplementary material for: Cryo-EM structures of the human Elongator complex at work
Source: PubMed Central journal article supplement (PMC11096365; doi:10.1038/s41467-024-48251-y), 2024-05-15
Supplement: 41467_2024_48251_MOESM1_ESM.pdf [file 41467_2024_48251_MOESM1_ESM.pdf]

## Supplementary Information

### Cryo-EM structures of the human Elongator complex at work

Nour-el-Hana Abbassi<sup>1,2,†</sup>, Marcin Jaciuk<sup>1,†</sup>, David Scherf<sup>3</sup>, Pauline Böhnert<sup>3</sup>, Alexander Rau<sup>4</sup>, Alexander Hammermeister<sup>1</sup>, Michal Rawski<sup>1,5</sup>, Paulina Indyka<sup>1,5</sup>, Grzegorz Wazny<sup>5,6</sup>, Andrzej Chramiec-Głąbik<sup>1</sup>, Dominika Dobosz<sup>1</sup>, Bozena Skupien-Rabian<sup>1</sup>, Urszula Jankowska<sup>1</sup>, Juri Rappsilber<sup>4,7</sup>, Raffael Schaffrath<sup>3,\*</sup> Ting-Yu Lin<sup>1,††,\*</sup> and Sebastian Glatt<sup>1,\*</sup>

#### Affiliations

<sup>1</sup> Małopolska Centre of Biotechnology (MCB), Jagiellonian University, Krakow, Poland

<sup>2</sup> Postgraduate School of Molecular Medicine, Medical University of Warsaw, Poland

<sup>3</sup> Institute for Biology, Department for Microbiology, University of Kassel, Kassel, Germany

<sup>4</sup> Bioanalytics, Institute of Biotechnology, Technical University of Berlin, Berlin, Germany

<sup>5</sup> SOLARIS National Synchrotron Radiation Centre, Jagiellonian University, Krakow, Poland

<sup>6</sup> Doctoral School of Exact and Natural Sciences, Jagiellonian University, Krakow, Poland

<sup>7</sup> Wellcome Centre for Cell Biology, University of Edinburgh, Edinburgh, UK

\* correspondence to schaffrath@uni-kassel.de (R.S.) ting-yu.lin@durham.ac.uk (T-Y.L) and sebastian.glatt@uj.edu.pl (S.G.)

† These authors contributed equally to this work

†† present address: Department of Biosciences, Durham University, Durham, UK

Running title – Structure and function of human Elongator

## 1 **Supplementary Method**

### 2 **Mass spectrometry analysis of acetylated peptides and peptide fragments**

3  
4 ELP123 complexes, including wild-type and mutants of ELP3, were produced and purified  
5 accordingly to the purification methods described in Methods. The purified ELP123 complexes  
6 were resolved in a 12% SDS-PAGE and protein bands were visualized using Coomassie blue  
7 staining. The ELP3 protein band was excised and protein identification was performed from  
8 gel bands. Samples (n=3, independent replicates) were prepared as described<sup>1</sup> with minor  
9 changes. Enzyme used for protein digestion was trypsin. Peptides were analyzed with LC/MS  
10 system consisting of nanoHPLC (UltiMate 3000 RSLCnano System, Thermo Fisher Scientific,  
11 Bremen, Germany) connected to Q Exactive mass spectrometer (Thermo Fisher Scientific)  
12 equipped with a Digital PicoView 550 nanospray source (New Objective). Peptides were  
13 applied onto a trap column (Acclaim PepMap 100 C18, 75  $\mu\text{m}$   $\times$  20 mm, 3  $\mu\text{m}$  particle, 100  
14  $\text{\AA}$  pore size, Thermo Fisher Scientific) in 2% acetonitrile with 0.05% TFA at a flow rate of 5  
15  $\mu\text{l}/\text{min}$  and further separated on analytical column (Acclaim PepMap RSLC C18, 75  $\mu\text{m}$   $\times$  500  
16 mm, 2  $\mu\text{m}$  particle, 100  $\text{\AA}$  pore size, Thermo Fisher Scientific) at 50°C with a 60-min gradient  
17 from 2 to 40% acetonitrile in 0.05% formic acid at a flow rate of 250 nl/min. The mass  
18 spectrometer was operated in a data-dependent mode using the Top8 method with 35 s of  
19 dynamic exclusion. MS and MS/MS data were acquired using Xcalibur (v. 3.1.66.10, Thermo  
20 Fisher Scientific). Full MS spectra (from m/z 300 to 1950) were acquired with a resolution of  
21 70,000 at m/z 200 with an automatic gain control (AGC) target of 1e6. The MS/MS spectra  
22 were acquired with a resolution of 35,000 at m/z 200 with an AGC target of 3e6. The maximum  
23 ion accumulation times for the full MS and the MS/MS scans were 120 and 110 ms,  
24 respectively. For accurate mass measurements, the lock mass option was enabled. The collected  
25 LC-MS/MS data were processed with the Proteome Discoverer platform (v.1.4; Thermo  
26 Scientific) and searched using an in-house MASCOT server (v.2.5.1; Matrix Science, London,  
27 UK) against cRAP database (<https://www.thegpm.org/crap/>, released August 2019)  
28 supplemented with the sequences of ELP123 proteins as well as ELP3 protein mutants. The  
29 following parameters were applied in the database search: enzyme – trypsin; missed cleavages  
30 – up to 2; fixed modifications – carbamidomethyl (C); variable modifications – oxidation (M),  
31 acetylation (KSTY), phosphorylation (STY); peptide mass tolerance: 10 ppm; fragment mass  
32 tolerance: 20 mmu; minimum peptide length: 5 amino acids. Results were filtered to meet the  
33 Mascot significance threshold 0.01 on peptide level.

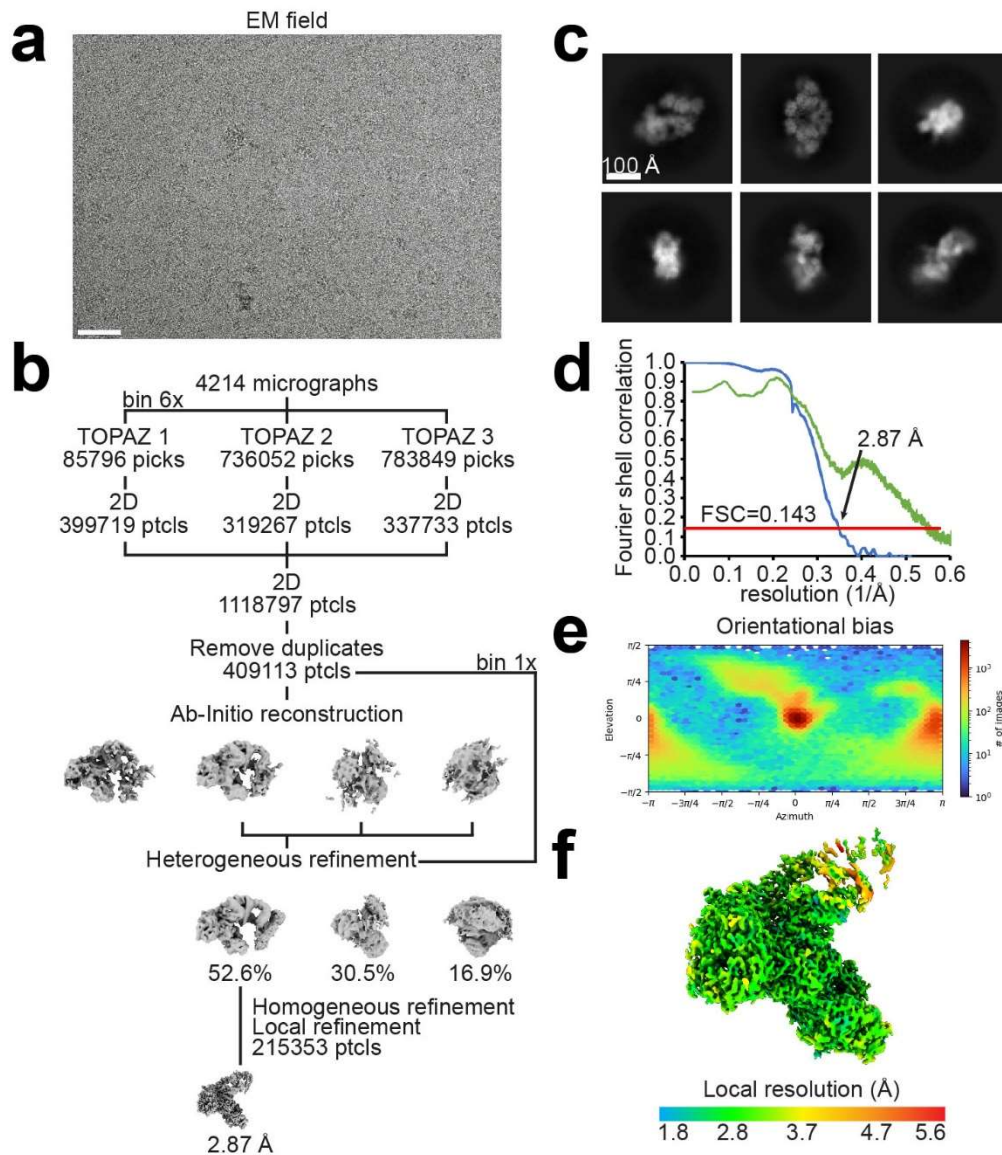

36

37 **Fig. S1. ELP123-tRNA<sup>Gln</sup>-acetyl-CoA cryo-EM reconstruction.** (a) Representative  
 38 cryo-EM field. Scale bar, 50 nm. (b) General processing pipeline. (c) Representative 2D  
 39 classes. (d) Fourier Shell Correlation. FSC=0.143 where the blue line shows the refinement  
 40 FSC and the green line shows the unmasked map-model FSC. (e) Orientational bias of the final  
 41 density. (f) Local resolution estimation.

42

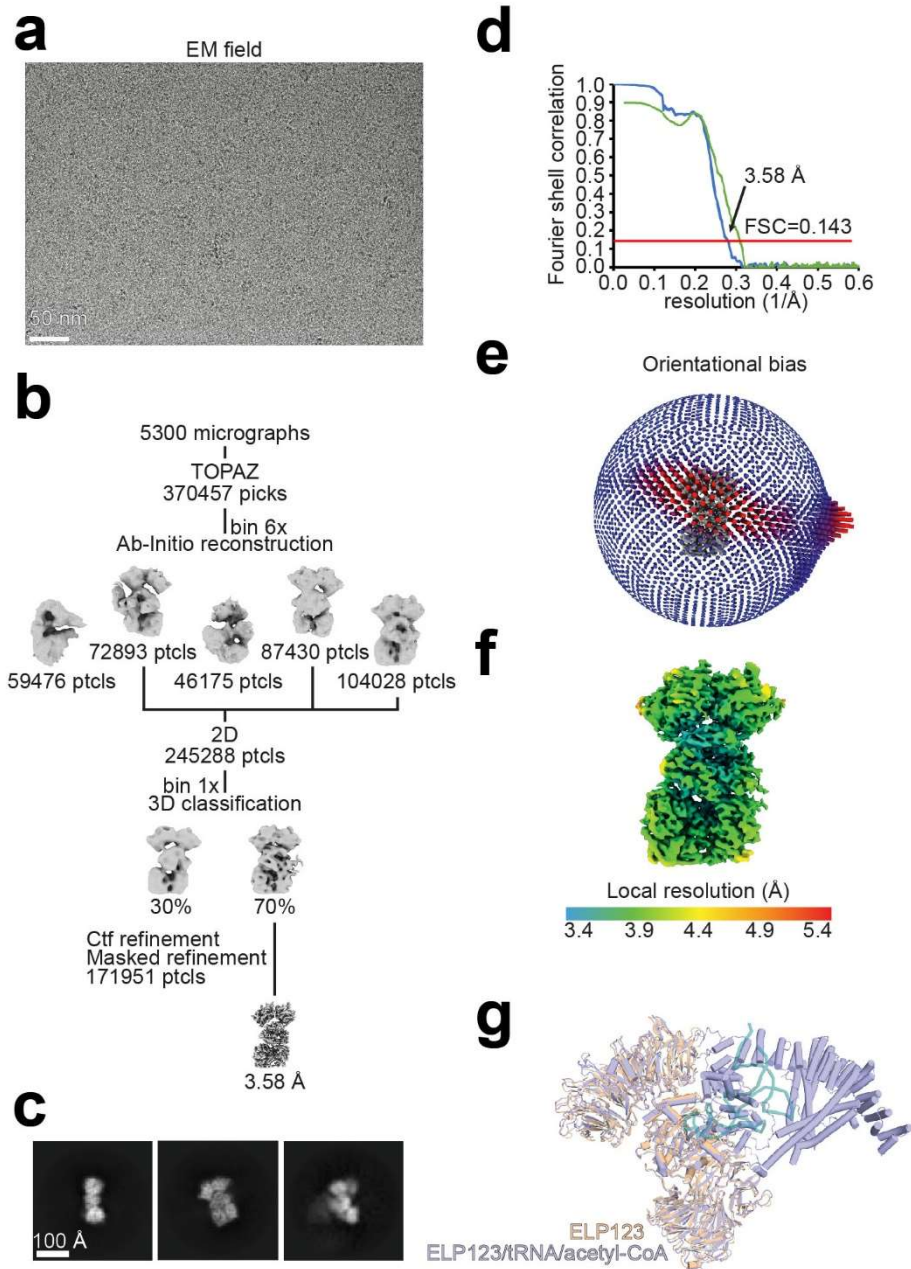

43

44 **Fig. S2. ELP123 cryo-EM reconstruction.** (a) Representative cryo-EM field. Scale bar, 50  
 45 nm. (b) General processing pipeline. (c) Representative 2D classes. (d) Fourier Shell  
 46 Correlation. FSC=0.143 where the blue line shows the refinement FSC and the green line  
 47 shows the unmasked map-model FSC. (e) Orientational bias of the final density. (f) Local  
 48 resolution estimation. (g) Superimposition of the ELP123 and ELP123-tRNA<sup>Gln</sup>-acetyl-  
 49 CoA.

50

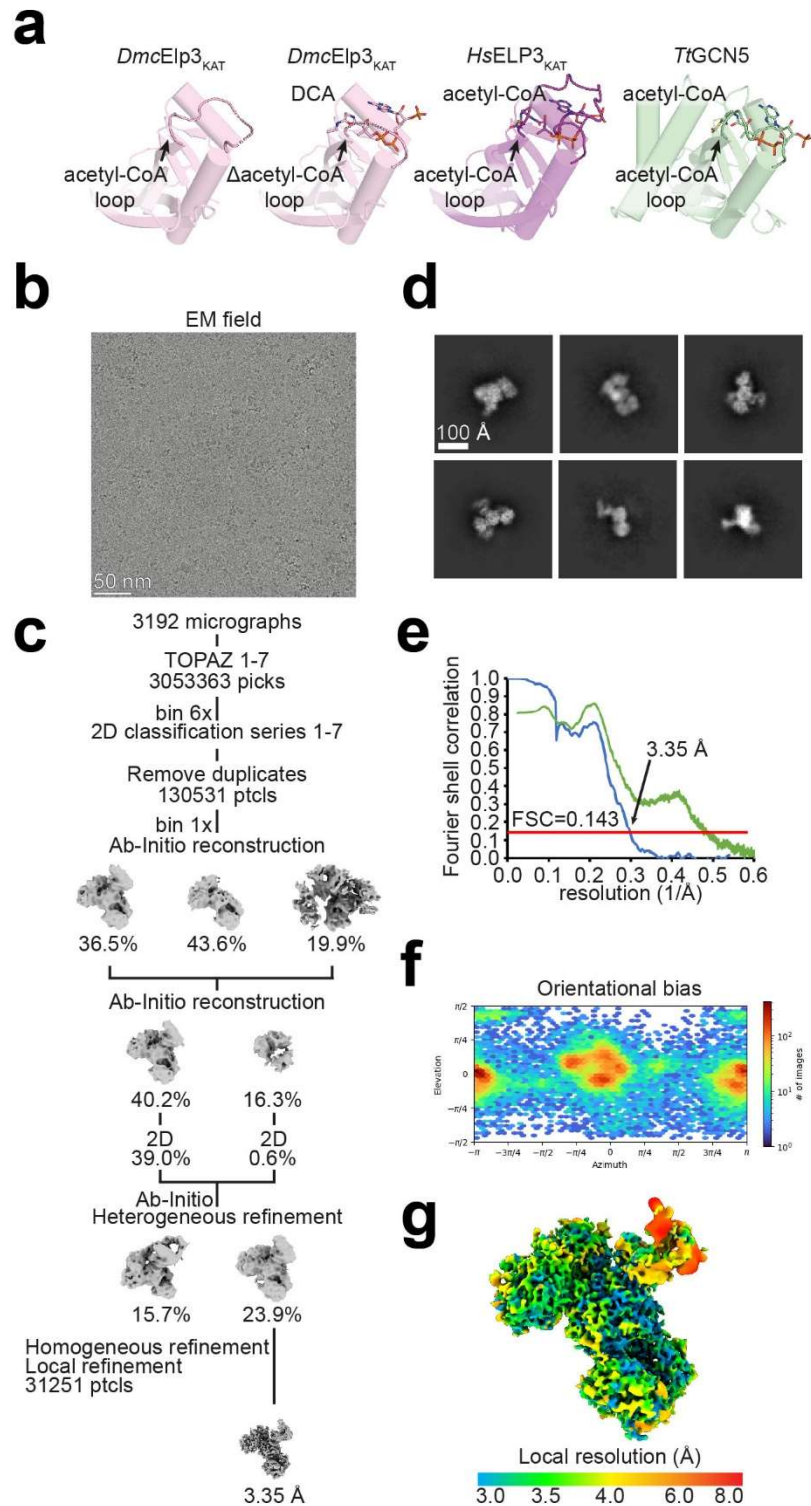

51

52 **Fig. S3. ELP123-tRNA<sup>Gln</sup>-UCA cryo-EM reconstruction.** (a) KAT domain comparison  
 53 between human ELP3 and *Dehalococcoides mccartyi* Elp3 (PDB ID 6IA6 and 5L7J) or  
 54 *Tetrahymena thermophila* Gcn5 (PDB ID 1QSR). (b) Representative cryo-EM field. Scale bar,  
 55 50 nm. (c) General processing pipeline. (d) Representative 2D classes. (e) Fourier Shell  
 56 Correlation. FSC=0.143 where the blue line shows the refinement FSC and the green line  
 57 shows the unmasked map-model FSC. (f) Orientational bias of the final density. (g) Local  
 58 resolution estimation.

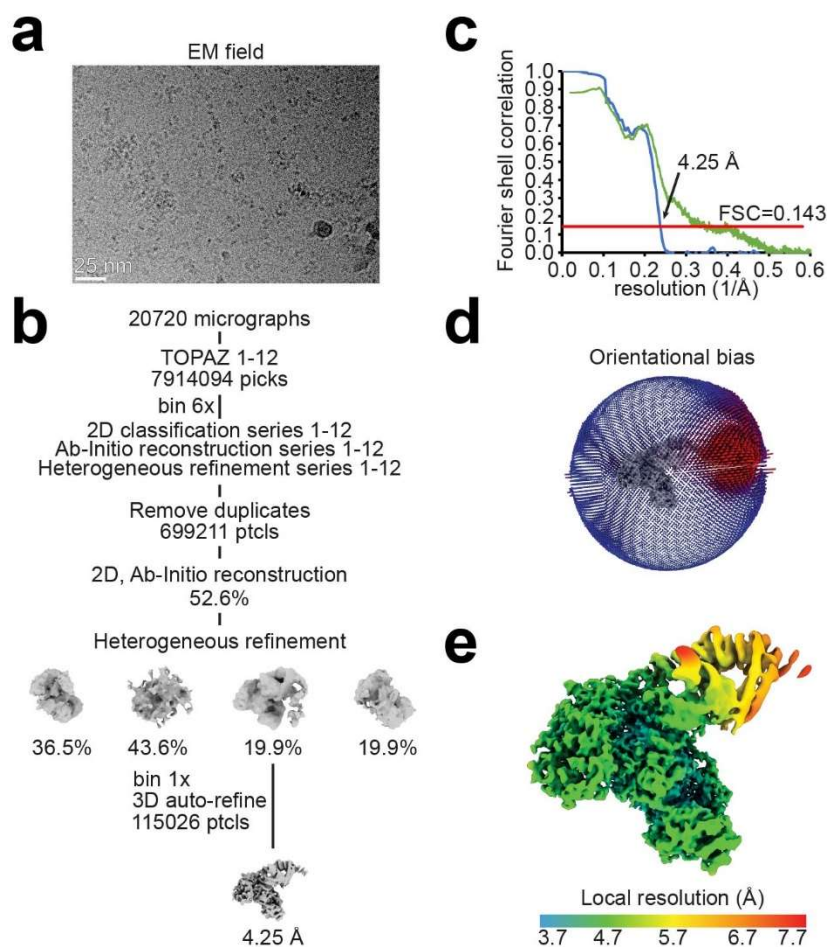

59

60 **Fig. S4. ELP123-tRNA<sup>Gln</sup>-DCA cryo-EM reconstruction.** (a) Representative cryo-EM  
 61 field. Scale bar, 50 nm. (b) General processing pipeline. (c) Fourier Shell Correlation.  
 62 FSC=0.143 where the blue line shows the refinement FSC and the green line shows the  
 63 unmasked map-model FSC. (d) Orientational bias of the final density. (e) Local resolution  
 64 estimation.

65

66

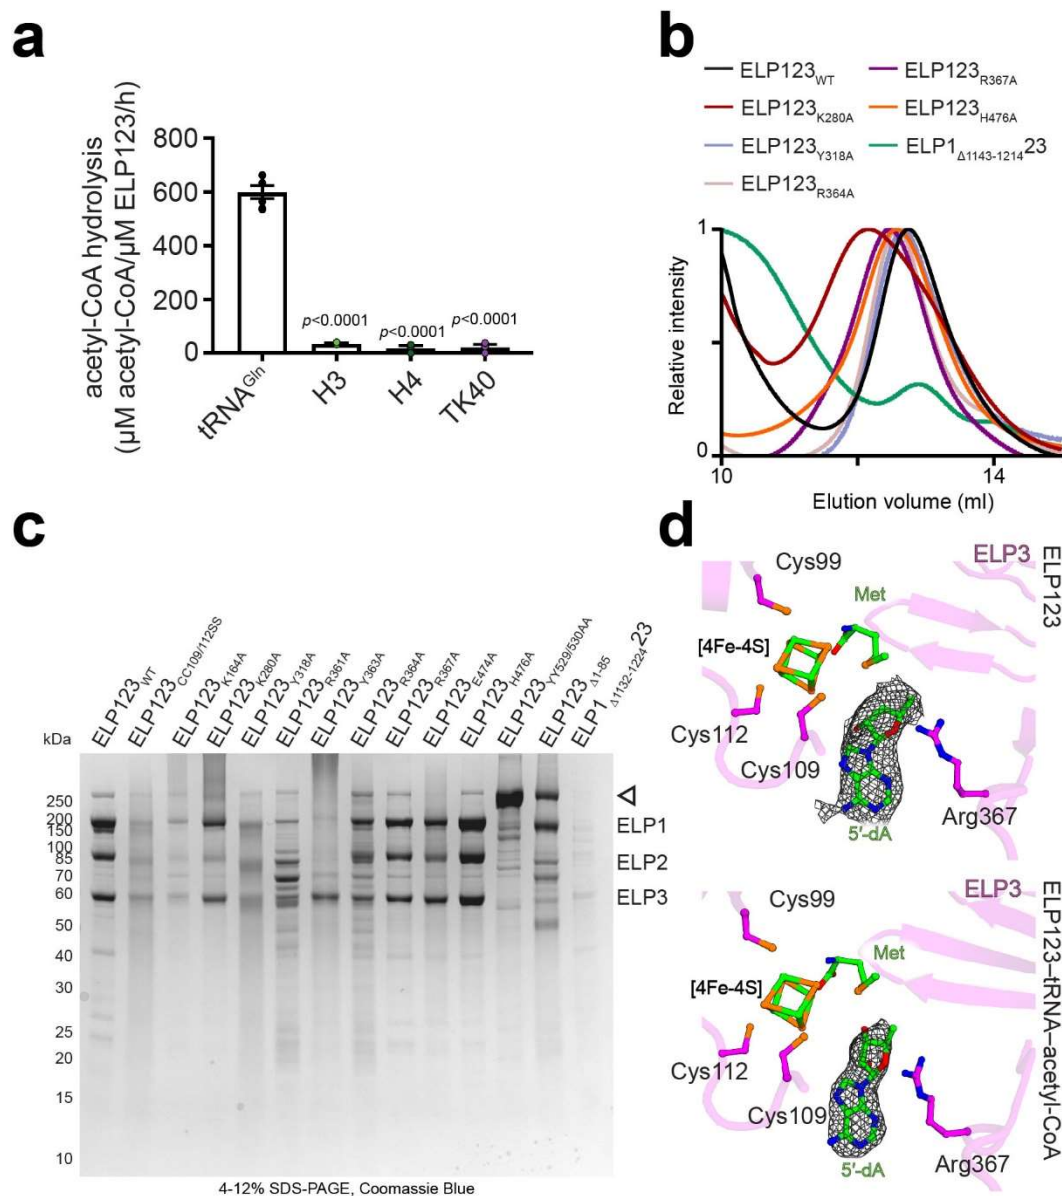

67  
68

69 **Fig S5. Purification of recombinant wild-type and various mutants of *HsELP123*.** (a)  
 70 Acetyl-CoA hydrolysis rates of ELP123 in the presence of tRNA<sup>Gln</sup><sub>UUG</sub> or protein peptides. n  
 71 = 3 (independent experiments). Statistical analysis: one-way ANOVA. Statistically significant  
 72 differences are indicated ( $p \leq 0.0001$ ). Data are presented as mean values  $\pm$  SEM. (b) SEC  
 73 purification profiles of ELP123 WT and mutants. (c) SDS-PAGE gel analysis of ELP123 wild-  
 74 type (WT) and mutant ELP123 subcomplex quality. The non-specifically co-purified  
 75 Acc1/ACACA protein<sup>2</sup> is indicated by the triangle. (d) Close-up views of the iron-sulfur  
 76 cluster, 5'-dA (respective densities are shown as mesh), and methionine in ELP123 and  
 77 ELP123-tRNA-acetyl-CoA structures. The coordinating residues are highlighted. Source data  
 78 are provided as a Source Data file.





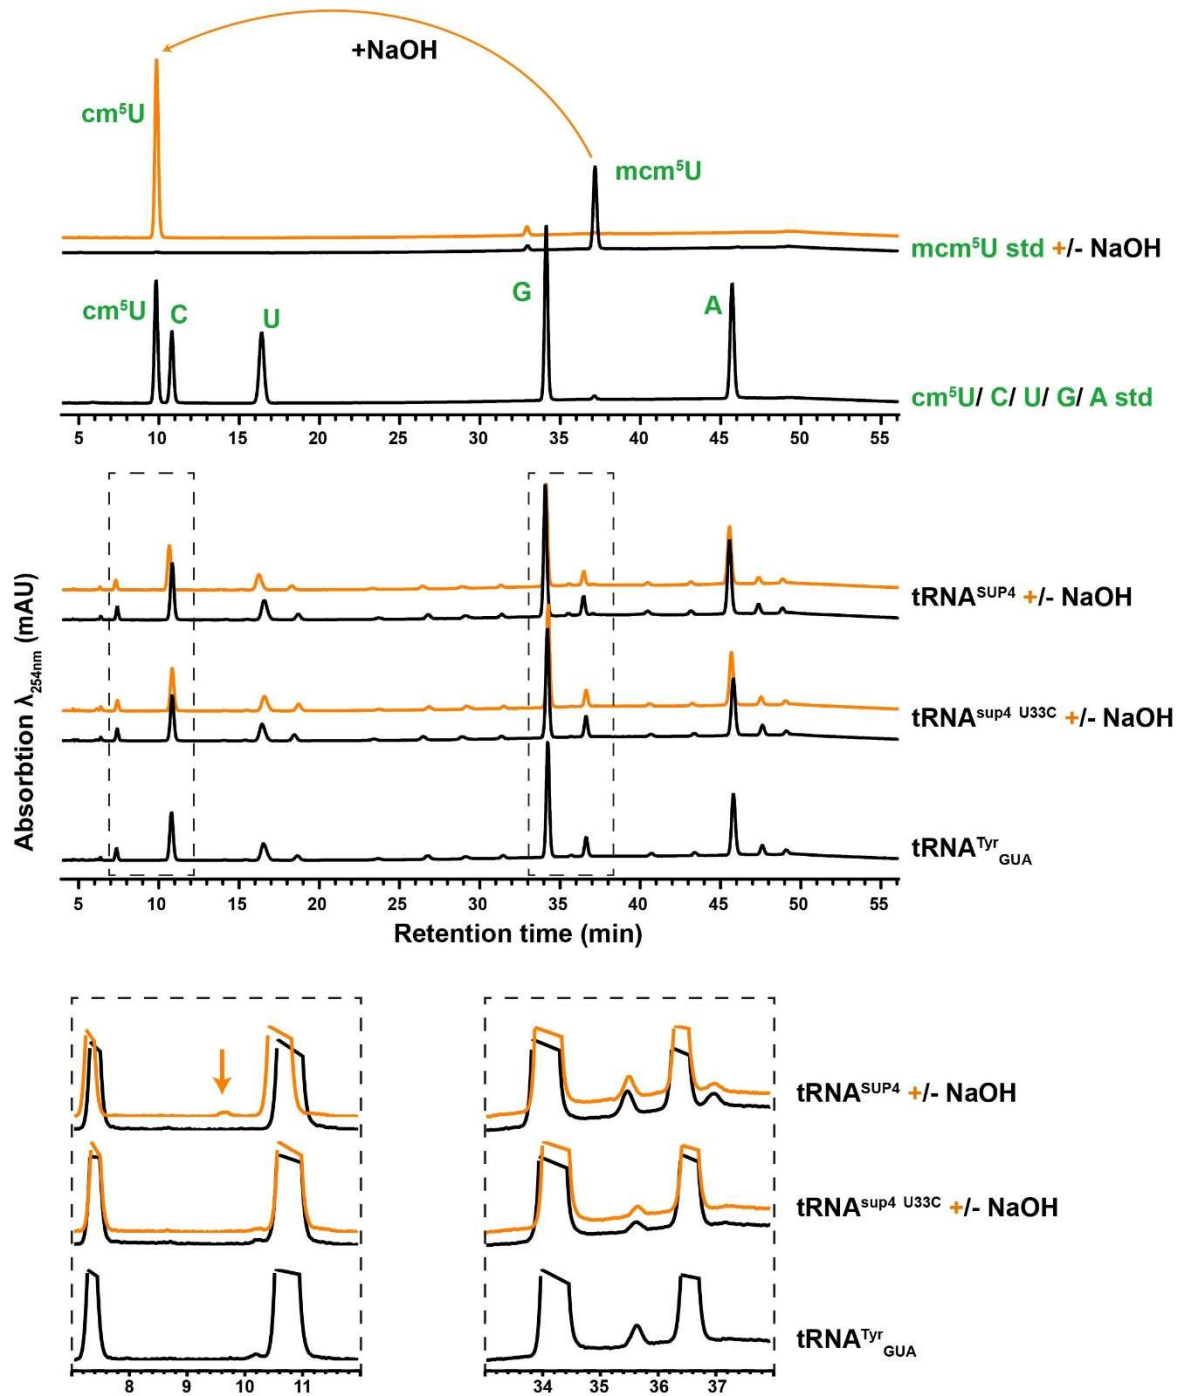

95  
 96  
 97  
 98  
 99  
 100  
 101  
 102  
 103  
 104

**Fig S7. HPLC profiles of digested tRNA nucleosides.** Analyses of mass standards (std; green) for U, C, G, A and modified uridine derivates ( $cm^5U$  and  $mcm^5U$ ) are shown at the top. Hydroxylation treatment (+ NaOH, orange) converts  $mcm^5U$  to  $cm^5U$ . Individual  $tRNA^{Tyr_{GUA}}$ ,  $tRNA^{SUP4}$  and  $tRNA^{sup4 U33C}$  were isolated from various yeast strains overexpressing wild type and mutated *SUP4* tRNA. The purified tRNA was enzymatically hydrolyzed to nucleosides, dephosphorylated and subjected to HPLC analysis. At the bottom, close up views for the regions of interest are shown and the NaOH-dependent peak of  $cm^5U$  (converted  $mcm^5U$ ) is highlighted by an orange arrow.

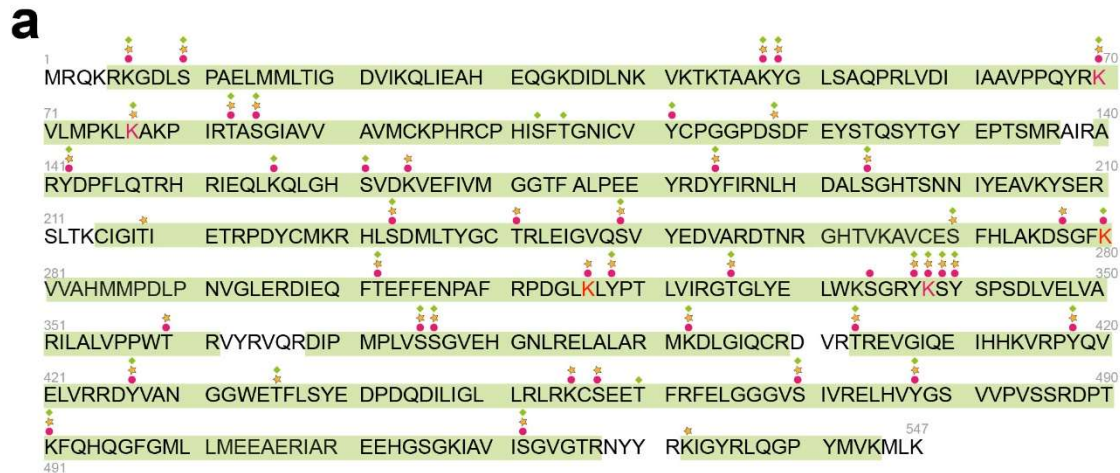

**b**

|           | • ELP3      | ★ ELP3 <sub>K280A</sub> | ◆ ELP3 <sub>Y363A</sub> |               |             |               |      |
|-----------|-------------|-------------------------|-------------------------|---------------|-------------|---------------|------|
|           | Sum of PSMs | Max ion score           | Sum of PSMs             | Max ion score | Sum of PSMs | Max ion score |      |
| K6/S10    | 369         | 118                     | K6/S10                  | 358           | 108         | K6/S10        | 329  |
| K48/Y49   | 21          | 62                      | K48/Y49                 | 22            | 52          | K48/Y49       | 17   |
| K70       | 5           | 27                      | K70                     | 6             | 19          | K70           | 3    |
| K77       | n.d.        | ---                     | K77                     | 1             | 14          | K77           | 1    |
| T83/S85   | 56          | 100                     | T83/S85                 | 50            | 84          | T83/S85       | 40   |
| S103/T105 | n.d.        | ---                     | S103/T105               | n.d.          | ---         | S103/T105     | 6    |
| Y111      | 30          | 74                      | Y111                    | n.d.          | ---         | Y111          | 6    |
| S118      | n.d.        | ---                     | S118                    | 4             | 42          | S118          | 11   |
| Y142      | 13          | 34                      | Y142                    | 18            | 44          | Y142          | 15   |
| K156      | 1           | 17                      | K156                    | n.d.          | ---         | K156          | 1    |
| S161      | 1           | 31                      | S161                    | n.d.          | ---         | S161          | 13   |
| K164      | 5           | 43                      | K164                    | 8             | 58          | K164          | n.d. |
| Y184      | 6           | 28                      | Y184                    | 3             | 21          | Y184          | 5    |
| S194      | 4           | 29                      | S194                    | 7             | 69          | S194          | 8    |
| T219      | n.d.        | ---                     | T219                    | 1             | 25          | T219          | n.d. |
| S233      | 5           | 38                      | S233                    | 2             | 26          | S233          | 12   |
| T241      | 4           | 76                      | T241                    | 4             | 50          | T241          | n.d. |
| S249      | 4           | 96                      | S249                    | 6             | 26          | S249          | 4    |
| S270      | n.d.        | ---                     | S270                    | 4             | 38          | S270          | 4    |
| S277      | 4           | 49                      | S277                    | 66            | 83          | S277          | n.d. |
| K280      | 2           | 49                      | K280                    | n.d.          | ---         | K280          | 6    |
| K302      | 8           | 43                      | K302                    | 7             | 44          | K302          | 6    |
| K316      | 1           | 35                      | K316                    | 1             | 38          | K316          | n.d. |
| Y318      | 13          | 24                      | Y318                    | 26            | 24          | Y318          | 20   |
| T326      | 7           | 32                      | T326                    | 6             | 41          | T326          | 5    |
| S334      | 2           | 61                      | S334                    | n.d.          | ---         | S334          | n.d. |
| Y337/K338 | 17          | 75                      | Y337/K338               | 26            | 59          | Y337/K338     | 26   |
| S339/Y340 | 244         | 77                      | S339/Y340               | 275           | 73          | S339/Y340     | 233  |
| T360      | 2           | 20                      | T360                    | 4             | 49          | T360          | n.d. |
| S375/S376 | 5           | 55                      | S375/S376               | 13            | 65          | S375/S376     | 34   |
| K392      | 10          | 49                      | K392                    | 6             | 37          | K392          | 1    |
| T403      | 11          | 57                      | T403                    | 12            | 43          | T403          | 14   |
| Y418      | 10          | 35                      | Y418                    | 9             | 34          | Y418          | 7    |
| Y427      | 20          | 134                     | Y427                    | 22            | 121         | Y427          | 32   |
| T435      | n.d.        | ---                     | T435                    | 6             | 74          | T435          | 18   |
| K455      | 5           | 39                      | K455                    | 5             | 52          | K455          | n.d. |
| S457      | 2           | 23                      | S457                    | 3             | 41          | S457          | n.d. |
| T460      | n.d.        | ---                     | T460                    | n.d.          | ---         | T460          | 1    |
| S470      | 1           | 48                      | S470                    | 3             | 65          | S470          | 3    |
| Y478      | 1           | 22                      | Y478                    | 20            | 54          | Y478          | 15   |
| K491      | 6           | 44                      | K491                    | 2             | 53          | K491          | 2    |
| S522      | 3           | 45                      | S522                    | 6             | 58          | S522          | 6    |
| K532      | n.d.        | ---                     | K532                    | 1             | 20          | K532          | n.d. |

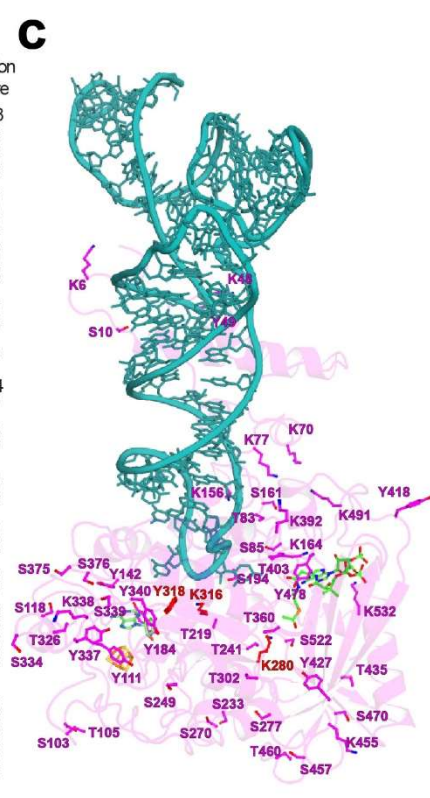

105  
106  
107  
108  
109  
110  
111  
112  
113  
114  
115  
116

**Fig S8. Mass spectrometry analysis of acetylation profiles of ELP3.** (a) Scheme of *HsELP3* protein sequence. The identified peptides by mass spectrometry are highlighted in green while the relevant acetylated lysine residues are shown in red. Above the modified residues are the colored symbols indicating in which condition they were found: ELP3, pink circle; ELP3<sub>K280A</sub>, yellow star; and ELP3<sub>Y363A</sub>, green diamond. (b) Tables of scores summarized from three independent mass spectrometry analyses. Ion score refers to the confidence level of the data, PSMs refers to the number of reads performed on each peptide. (c) Mapping the identified acetylated lysine residues in ELP3 and the bound tRNA. Lys280, Lys316 and Tyr318 are highlighted in red.

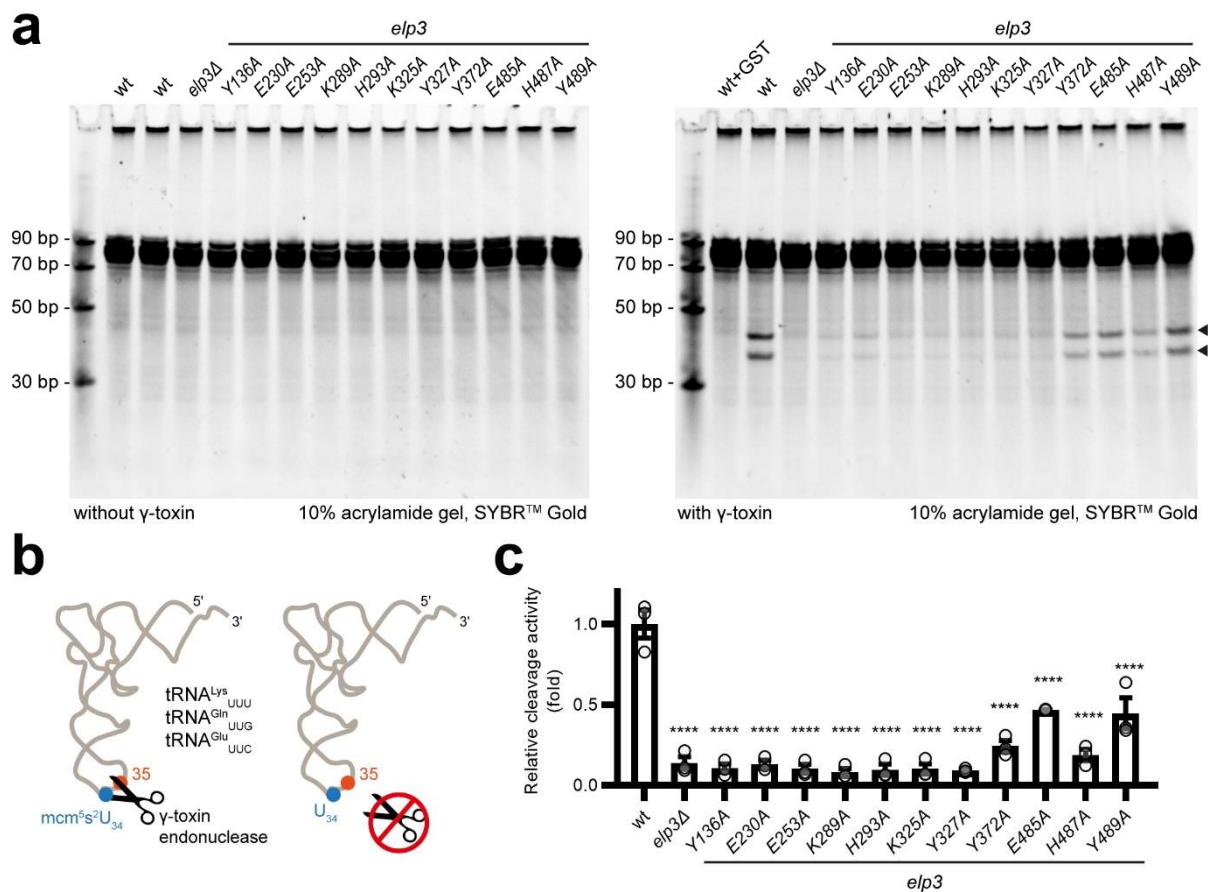

117  
118  
119  
120  
121  
122  
123  
124  
125  
126  
127

**Fig S9. Elongator dependent anticodon cleavage assays with  $\gamma$ -toxin tRNase and bulk tRNAs isolated from yeast strains carrying *ELP3* gene mutations.** (a) Representative TBE-UREA gels showing *in vitro*  $\gamma$ -toxin cleavage of isolated yeast bulk tRNA. The cleavage products are indicated by triangles. n = 3 (independent experiments). (b) tRNA recognition specificity for the  $\gamma$ -toxin tRNase. (c) Relative cleavage activity measured on tRNA from (a). n = 3 (independent experiments). Statistical analysis: one-way ANOVA. Statistically significant differences are indicated ( $p \leq 0.0001$ ). Data are presented as mean values  $\pm$  SEM. Source data are provided as a Source Data file.

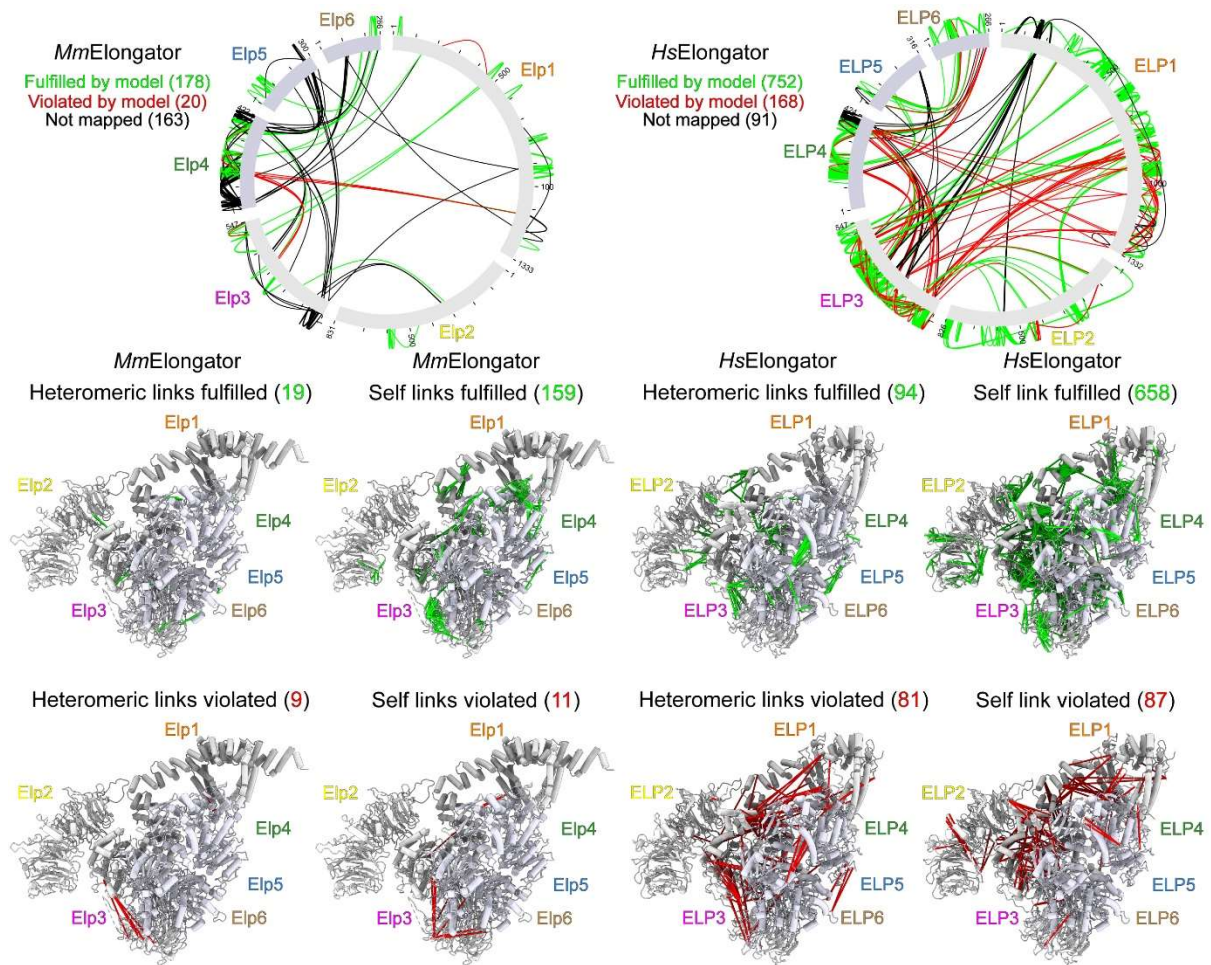

128  
 129  
 130  
 131  
 132  
 133  
 134

**Fig S10. Crosslinking mass spectrometry analyses of the full assembled Elongator complex from mouse and human.** Schematic representation of heteromeric- and self-links fulfilled by the model (green) or violated by the model (red) of mouse and human reconstituted Elongator. Links not mapped in the models are shown in black.

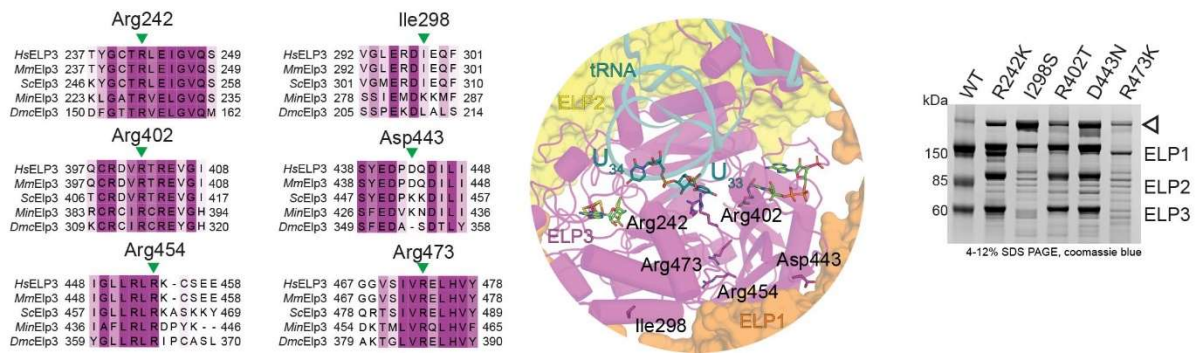

135

136 **Fig S11. Analyses of clinically relevant mutations in ELP3.** (left) Scheme of partial sequence  
137 alignments of the clinically relevant mutations of ELP3. (middle) Mapping of the clinically  
138 relevant mutations in ELP3 and the residues are highlighted. (right) SDS-PAGE gel analysis  
139 of the quality of wild-type (WT) and mutant ELP123 complexes. The non-specifically co-  
140 purified Acc1/ACACA protein<sup>2</sup> is indicated by the triangle. Source data are provided as a  
141 Source Data file.

142 **Table S1. Yeast strains used and generated for *ELP3* gene mutagenesis and**  
 143 **characterization.**

144

| Strain  | Relevant genotype                                                             | Source           |
|---------|-------------------------------------------------------------------------------|------------------|
| UMY2893 | MAT $\alpha$ <i>SUP4 leu2-3,112 trp1-1 can1-100 ura3-1 ade2-1 his3-11,15</i>  | Ref <sup>3</sup> |
| ySF325  | UMY2893, <i>ELP1-(c-myc)<sub>3x</sub>::loxp, ELP5-FLAG<sub>3x</sub>::loxp</i> | This study       |
| ySF326  | ySF325, <i><math>\Delta</math>elp3::KIURA3</i>                                | This study       |
| yPB48   | ySF325, <i>elp3-Y136A::kITRP1</i>                                             | This study       |
| yPB49   | ySF325, <i>elp3-E230A::kITRP1</i>                                             | This study       |
| yPB50   | ySF325, <i>elp3-E253A::kITRP1</i>                                             | This study       |
| yPB51   | ySF325, <i>elp3-K289A::kITRP1</i>                                             | This study       |
| yPB52   | ySF325, <i>elp3-H293A::kITRP1</i>                                             | This study       |
| yPB53   | ySF325, <i>elp3-K325A::kITRP1</i>                                             | This study       |
| yPB54   | ySF325, <i>elp3-Y327A::kITRP1</i>                                             | This study       |
| yPB55   | ySF325, <i>elp3-Y372A::kITRP1</i>                                             | This study       |
| yPB56   | ySF325, <i>elp3-E485A::kITRP1</i>                                             | This study       |
| yPB57   | ySF325, <i>elp3-H487A::kITRP1</i>                                             | This study       |
| yPB58   | ySF325, <i>elp3-Y489A::kITRP1</i>                                             | This study       |
| yPB59   | ySF325, <i>ELP3::kITRP1</i>                                                   | This study       |

145 **Table S2. Strains used for *SUP4* purification.**

| Strain  | Relevant genotype                                                       | Source           |
|---------|-------------------------------------------------------------------------|------------------|
| W303-1B | MAT $\alpha$ <i>leu2-3,112 trp1-1 can1-100 ura3-1 ade2-1 his3-11,15</i> | Rodney Rothstein |
| ySF329  | W303-1B, <i><math>\Delta</math>elp3::KIURA3</i>                         | This study       |

146 **Table S2. Plasmids used for *SUP4* purification, mutagenesis and cloning.**

| Plasmid   | Properties                                      | Source           |
|-----------|-------------------------------------------------|------------------|
| YCplac111 | <i>Amp<sup>R</sup> CEN4 ARS1 ScLEU2</i>         | Ref <sup>4</sup> |
| pSF305    | <i>YCplac111, SUP4 +-200bp</i>                  | This study       |
| pSF307    | <i>pSF305, sup4-U33C</i>                        | This study       |
| YEplac181 | <i>Amp<sup>R</sup> 2<math>\mu</math> ScLEU2</i> | Ref <sup>4</sup> |
| pSF306    | <i>Yeplac181, SUP4 +-200bp</i>                  | This study       |
| pSF308    | <i>pSF306, sup4-U33C</i>                        | This study       |

147

## 148 **References**

149

- 150 1. Pabis, M. *et al.* Molecular basis for the bifunctional Uba4–Urm1 sulfur-relay system in tRNA thiolation  
 151 and ubiquitin-like conjugation. *EMBO J* **39**, e105087 (2020).
- 152 2. Jaciuk, M. *et al.* Cryo-EM structure of the fully assembled Elongator complex. *Nucleic Acids Res* **51**,  
 153 2011–2032 (2023).
- 154 3. Huang, B., Johansson, M. J. O. O. & Byström, A. S. An early step in wobble uridine tRNA modification  
 155 requires the Elongator complex. *Rna* **11**, 424–436 (2005).
- 156 4. Gietz, R. D. & Akio, S. New yeast-Escherichia coli shuttle vectors constructed with in vitro  
 157 mutagenized yeast genes lacking six-base pair restriction sites. *Gene* **74**, 527–534 (1988).

158
