# Supplementary material for: Cryo-EM structures of the human Elongator complex at work
Source: PubMed Central journal article supplement (PMC11096365; doi:10.1038/s41467-024-48251-y), 2024-05-15
Supplement: 41467_2024_48251_MOESM3_ESM.pdf [file 41467_2024_48251_MOESM3_ESM.pdf]

### **Description of Additional Supplementary Information**

**Supplementary Movie S1.** Deformation of the ASL upon binding to ELP123, followed by the flipping out of U33.
